# Supplementary material
Source: PubMed Central journal article supplement (PMC4511196)
Supplement: supp_fj.14-268136_Supplemental_Figure1.pdf [file supp_fj.14-268136_Supplemental_Figure1.pdf]

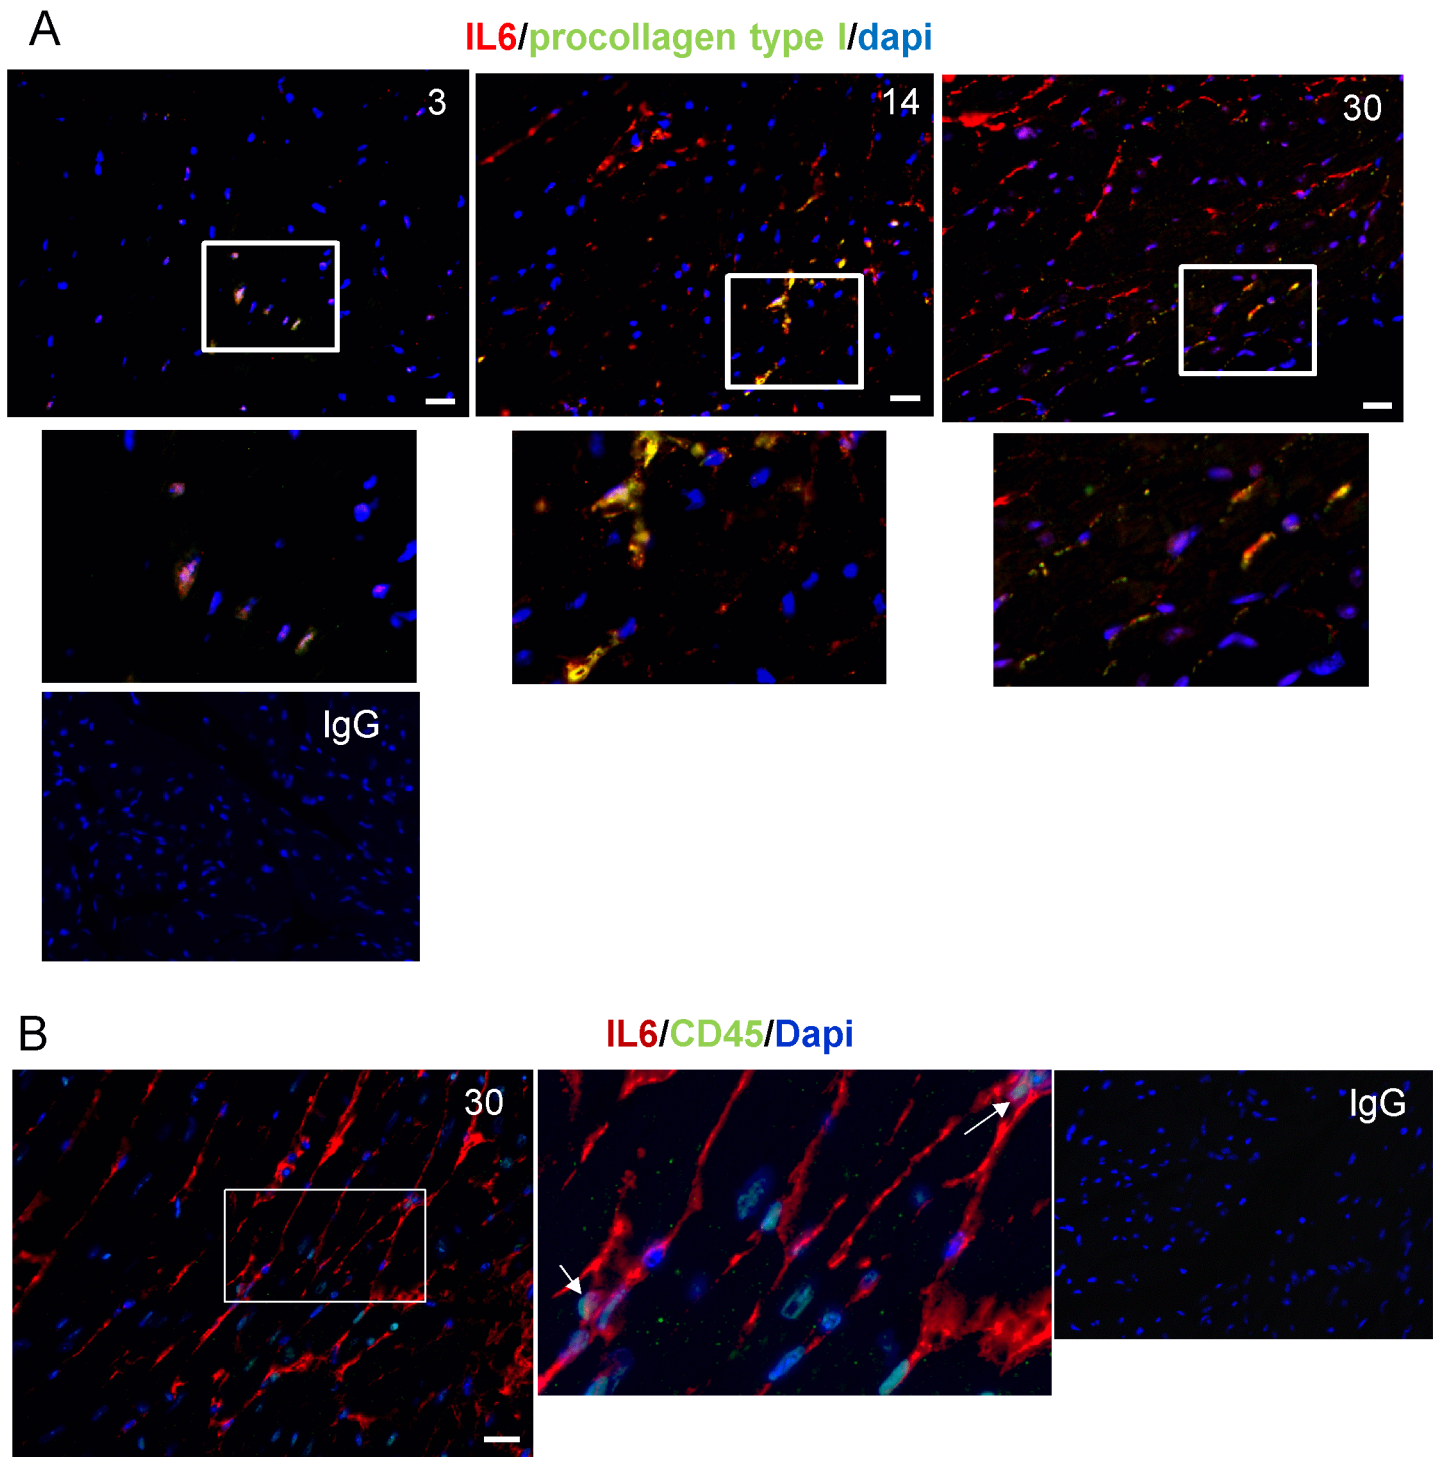

**Supplemental Figure 1.**

**A.** Double immunofluorescence labeling of IL-6 (red) and procollagen type I (green) in 3-, 14-, and 30-month old mouse hearts. Double positive cells are visualized in yellow/orange color. Middle panel shows magnified image of the section marked by white squares. Lower panel shows IgG control. **B.** Majority of IL-6 expressing cells in 30 month old heart are CD45<sup>neg</sup>. Nuclei were stained with dapi. Scale bar = 20  $\mu$ m. Sections from 3 animals per age group were analyzed.
